# Supplementary material
Source: publisher figshare collection journal article supplement (https://acs.figshare.com/ndownloader/files/9410524)
Supplement: Supplementary file 1 [file 9410524]

# Supporting Information

Highly porous polymer structures fabricated via rapid precipitation  
from ternary systems

Ehsan Rezabeigi\*, Robin A.L. Drew, and Paula M. Wood-Adams

*Department of Mechanical, Industrial and Aerospace Engineering, Concordia University, Montreal,  
Quebec, Canada*

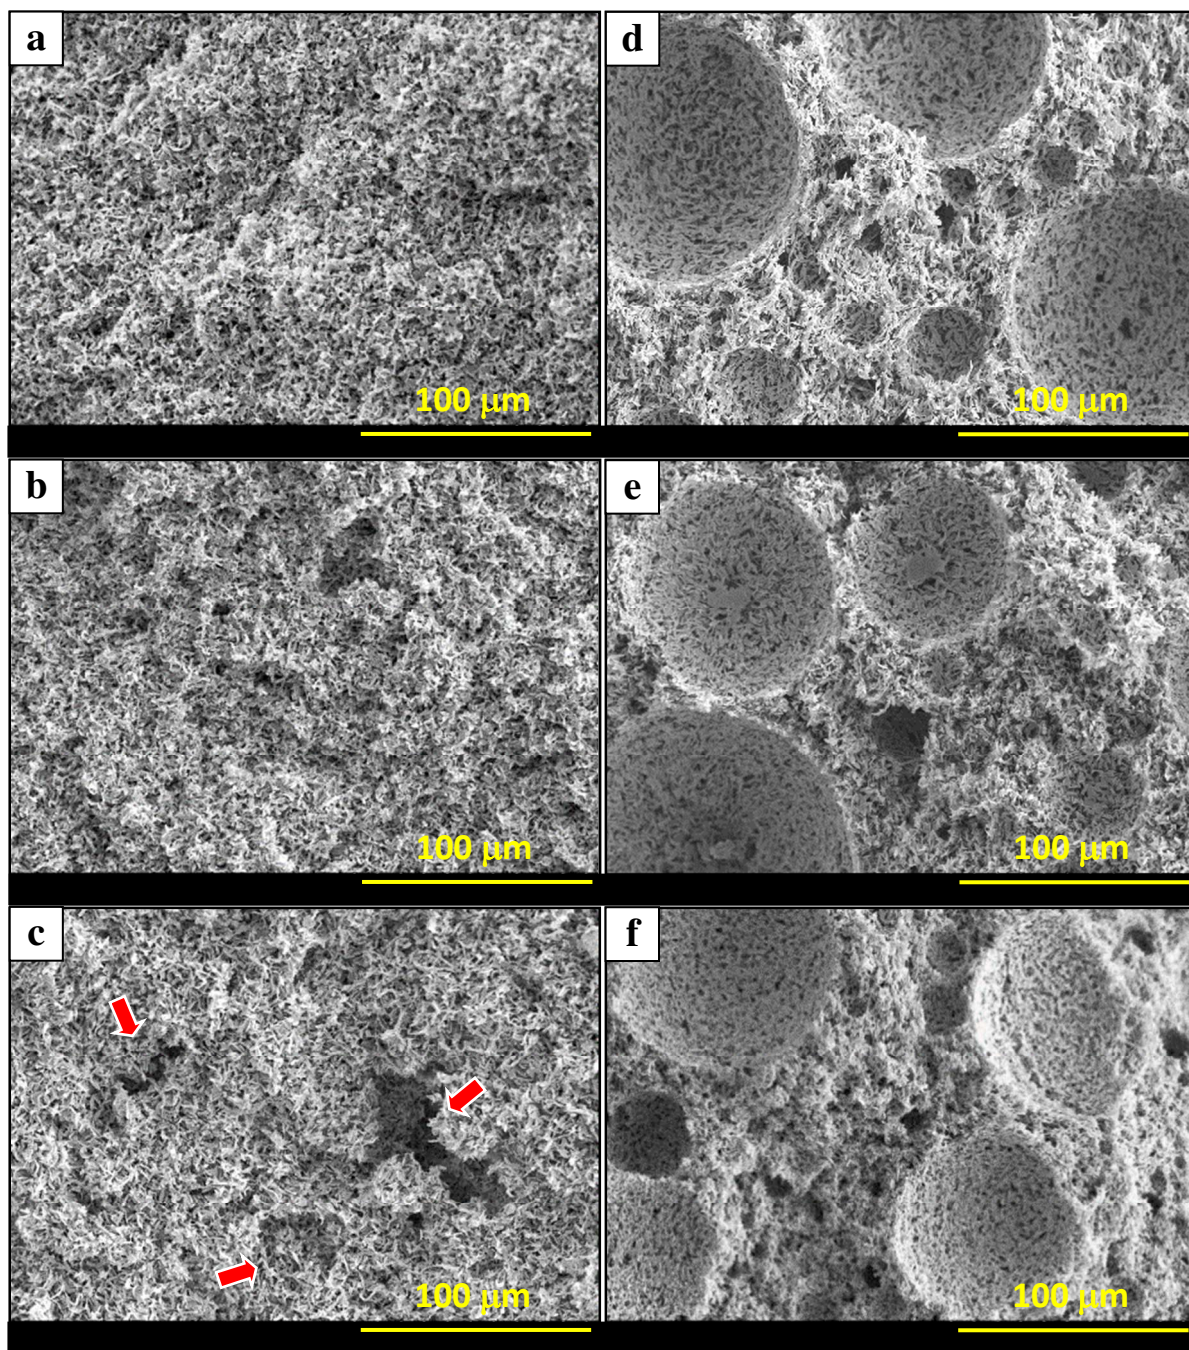

Figure S1. SEM images of Figure 3 at a larger scale, better showing their morphological details: a, b, c, d, e, f: (5, 8, 10, 13, 16, 18 wt.%, 1.25 v/v). The arrows in image (c) indicate collapsed macropores.

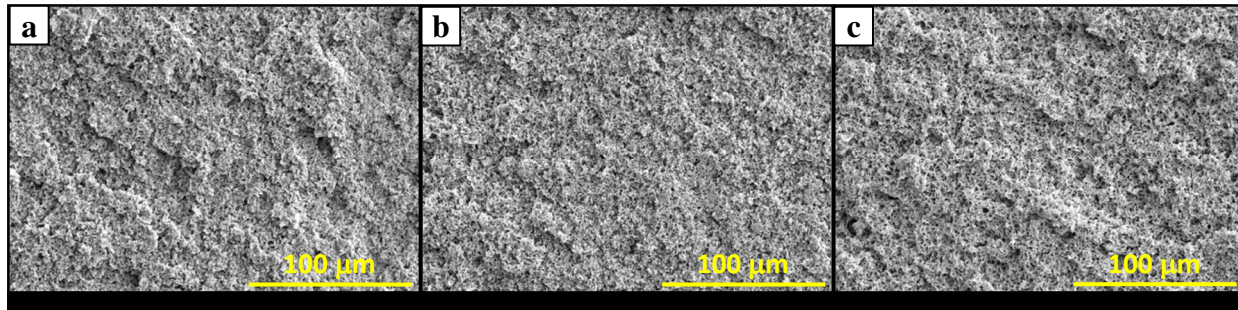

Figure S2. SEM images of foams produced from liquid-liquid phase separated systems: a, b, c: (13, 16, 18 wt.%, 1 v/v). These images correspond to the images of Figure 3.

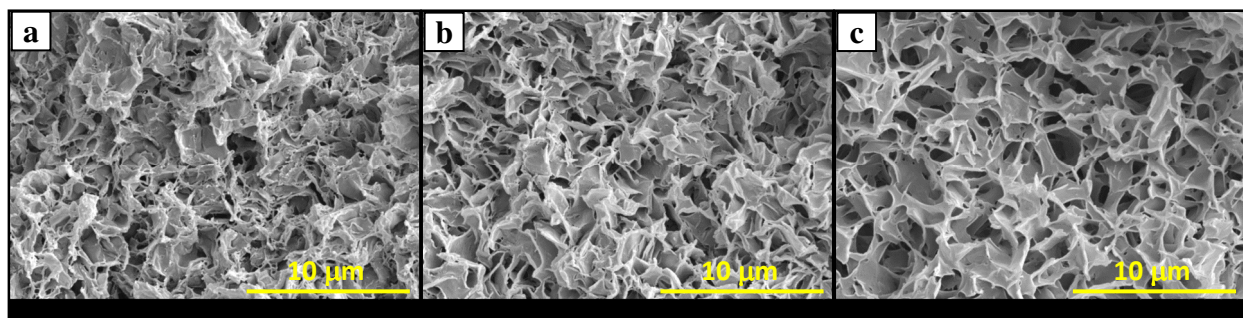

Figure S3. SEM images of foams produced from liquid-liquid phase separated systems: a, b, c: (13, 16, 18 wt.%, 1 v/v). These images are magnifications of regions of the images in Figure S2 and correspond to the images of Figure 4.
